# Supplementary material for: Body mass index associated with childhood and adolescent high‐risk B‐cell acute lymphoblastic leukemia risk: A Children’s Oncology Group report
Source: PubMed Central journal article supplement (PMC7520304; doi:10.1002/cam4.3334), 2020-07-24

### A. NH White

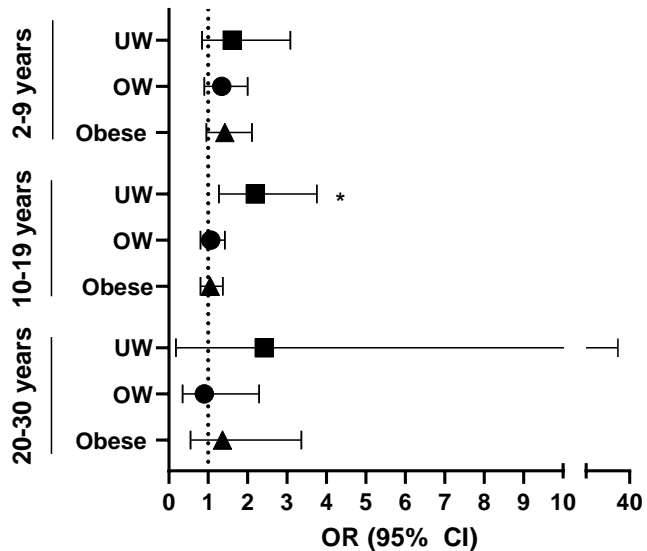

### B. Hispanic

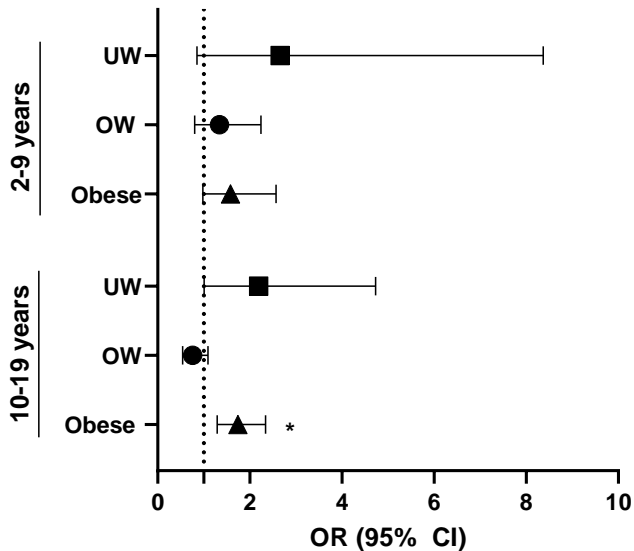

Supplement: CAM4-9-6825-s002.pdf [file CAM4-9-6825-s002.pdf]
